# Supplementary material for: Peroxisomal catalase deficiency modulates yeast lifespan depending on growth conditions
Source: publisher site journal article supplement (doi:10.18632/aging.100519), 2013-01-19
Supplement: Supplementary file [file aging-v5i1-100519-supplementary-material-SD1.pdf]

46. Waterham HR, Titorenko VI, Haima P, Cregg JM, Harder W and Veenhuis M. The *Hansenula polymorpha* *PER1* gene is essential for peroxisome biogenesis and encodes a peroxisomal matrix protein with both carboxy- and amino-terminal targeting signals. *J Cell Biol.* 1994; 127:737-749.

47. Klei IJ, Harder W and Veenhuis M. Methanol metabolism in a peroxisome-deficient mutant of *Hansenula polymorpha*: a physiological study. *Arch Microbiol.* 1991; 156:15-23.

48. Lück H. (1963). *Catalase*. (New York: Academic Press).

49. Culotta VC, Klomp LWJ, Strain J, Casareno RLB, Krebs B and Gitlin JD. The copper chaperone for superoxide dismutase. *J Biol Chem.* 1997; 272:23469-23472.

50. Flohe L and Otting F. Superoxide dismutase assays. *Methods Enzymol.* 1984; 105:93-104.

51. Verduyn C, Giuseppin MLF, Scheffers WA and van Dijken JP. Hydrogen peroxide metabolism in yeasts. *Appl Environ Microbiol.* 1988; 54:2086-2090.

52. Baerends RJ, Faber KN, Kram AM, Kiel JA, van der Klei IJ and Veenhuis M. A stretch of positively charged amino acids at the N terminus of *Hansenula polymorpha* Pex3p is involved in incorporation of the protein into the peroxisomal membrane. *J Biol Chem.* 2000; 275:9986-9995.

53. Sudbery PE, Gleeson MA, Veale RA, Ledebouer AM and Zoetmulder MC. *Hansenula polymorpha* as a novel yeast system for the expression of heterologous genes. *Biochem Soc Trans.* 1988; 16:1081-1083.

54. Nagotu S, Saraya R, Otzen M, Veenhuis M and van der Klei IJ. Peroxisome proliferation in *Hansenula polymorpha* requires Dnm1p which mediates fission but not de novo formation. *Biochim Biophys Acta.* 2008; 1783:760-769.

55. Nagotu S, Krikken AM, Otzen M, Kiel JAKW, Veenhuis M and Van Der Klei IJ. Peroxisome fission in *Hansenula polymorpha* requires Mdv1 and Fis1, two proteins also involved in mitochondrial fission. *Traffic.* 2008; 9:1471-1484.

56. Saraya R, Krikken AM, Veenhuis M and van der Klei IJ. Peroxisome reintroduction in *Hansenula polymorpha* requires Pex25 and Rho1. *J Cell Biol.* 2011; 193:885-900.

## SUPPLEMENTARY FIGURES

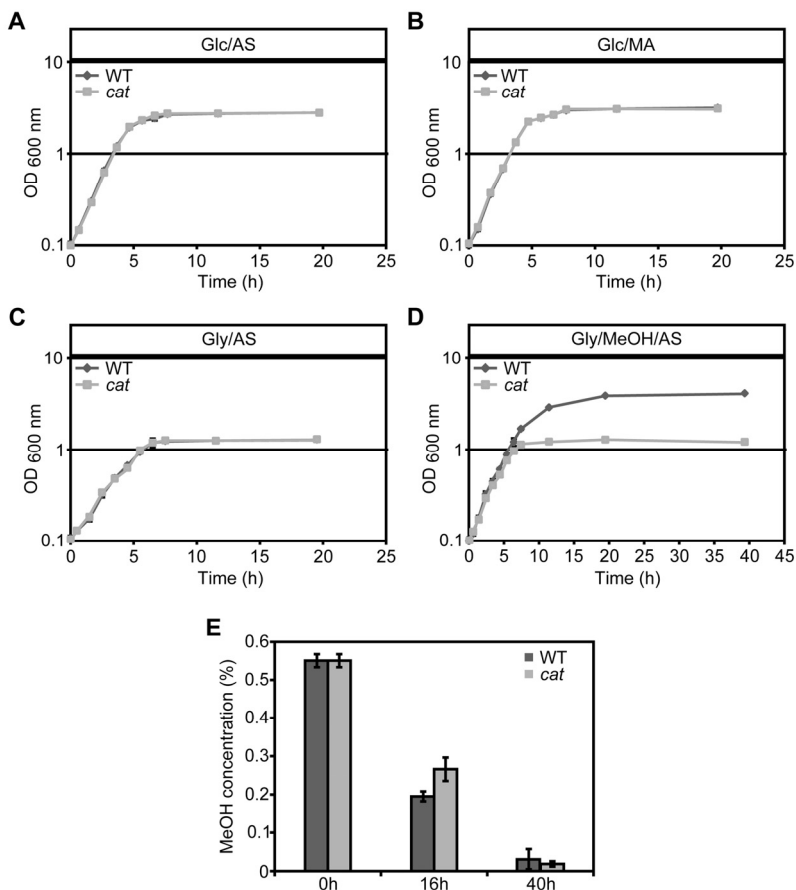

**Figure S1. Growth curves of WT and *cat* cells.** Cells were grown on (A) Glc/AS, (B) Glc/MA, (C) Gly/AS or (D) Gly/MeOH/AS. Optical densities are expressed as OD<sub>600 nm</sub>. (E) Residual methanol concentrations in WT and *cat* cultures at different time points after shifting the cells to Gly/MeOH/AS. Bars indicate SD of 3 independent cultures.

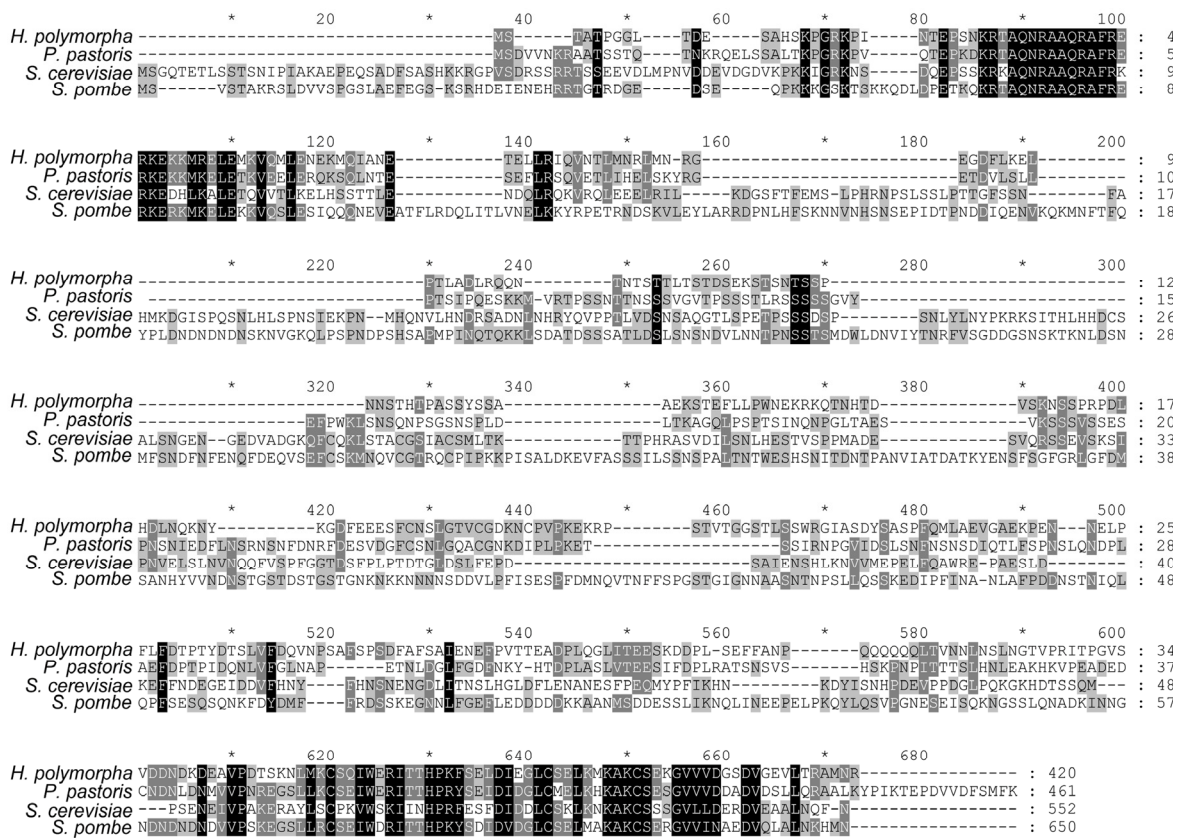

**Figure S2. Sequence alignment of Yap1 homologues from different yeast species.** The gene bank accession numbers are: *H. polymorpha* (EFW96135), *P. pastoris* (XP\_002494040), *S. pombe* (CAB66170), *S. cerevisiae* (NP\_013707).

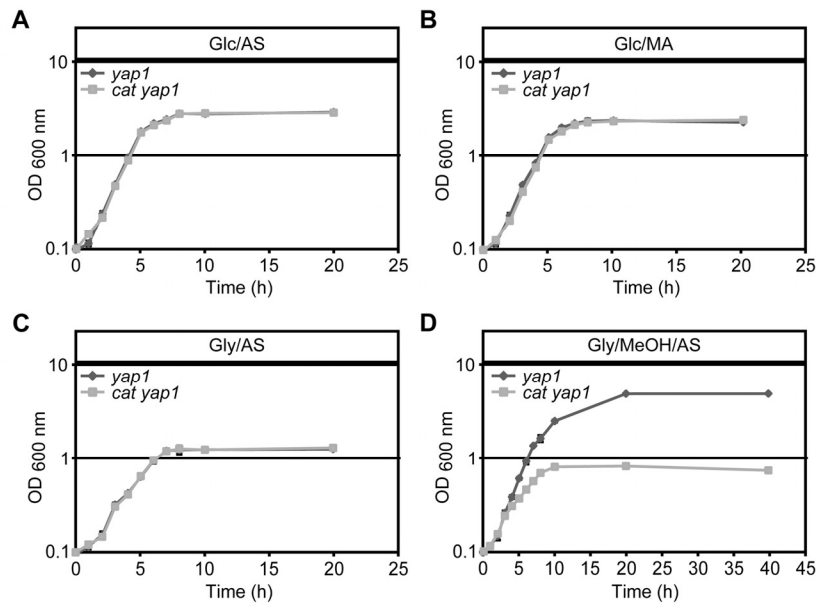

**Figure S3. Growth curves of yap1 and cat yap1 cells.** Cells were grown on (A) Glc/AS, (B) Glc/MA, (C) Gly/AS, (D) (Gly/MeOH/AS). Bars indicate SD of 2 independent cultures.
